# Supplementary material for: QbD Approach-Based Preparation and Optimization of Hydrophobic Ion-Pairing Complex of Lysozyme with Sodium Dodecyl Sulphate to Enhance Stability in Lipid-Based Carriers
Source: MDPI journal article supplement (doi:10.3390/pharmaceutics16050589), 2024-04-26
Supplement: s1 [file s1]

## Supplementary Materials

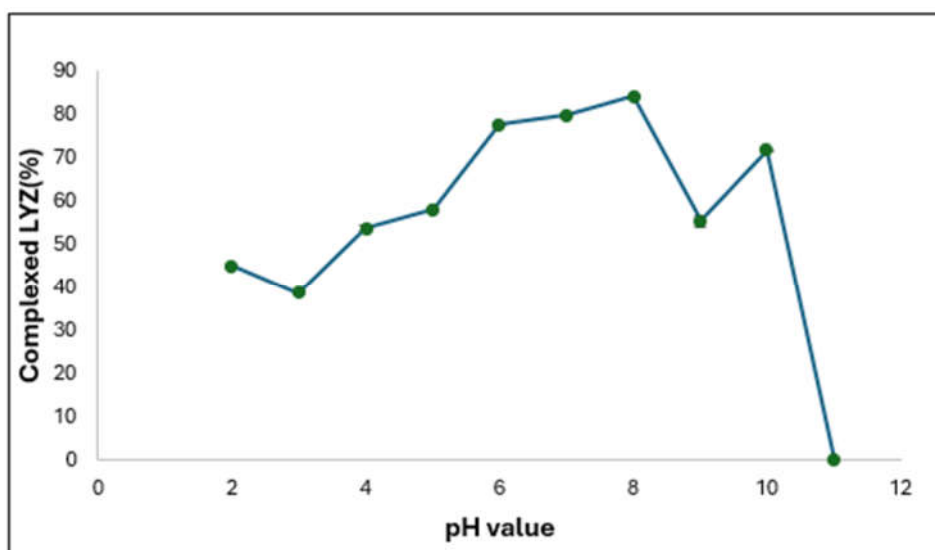

**Figure S1.** The Percentage of the complexed LYZ with SDS at 1:6 molar ratio at different pH values (average of three replicates).

### QTPP-CQA: HIP complex of Lysozyme

| CQA                                                | QTPP | Enhancing the lipophilicity | Preserving the biological activity | Reversibility |
|----------------------------------------------------|------|-----------------------------|------------------------------------|---------------|
| High complexation efficiency                       |      | High                        | Medium                             | Low           |
| Preserving of the secondary structure              |      | Medium                      | High                               | Low           |
| Complex stability (during preparation and storage) |      | High                        | Low                                | Low           |
| High recovery (%)                                  |      | Low                         | Low                                | High          |

**Figure S2.** The interrelationship between the quality target product profile (QTPP) and the critical quality attributes (CQA) of peptide/protein HIP complex.

| Process:                                           |          | Incubation of protein with IPA |          |                   |                  |          |                 |                        |                  | Centrifugation       |                     |                            | Drying        |                    |             |
|----------------------------------------------------|----------|--------------------------------|----------|-------------------|------------------|----------|-----------------|------------------------|------------------|----------------------|---------------------|----------------------------|---------------|--------------------|-------------|
| CQAs                                               | CPP/CMA: | Type of protein/peptide        | IPA type | Protein:IPA ratio | Buffering system | pH value | Incubation time | Incubation temperature | Mixing technique | Centrifugation speed | Centrifugation time | Centrifugation temperature | Drying method | Drying temperature | Drying time |
| High complexation efficiency                       |          | Medium                         | Medium   | High              | Low              | High     | Medium          | Low                    | Low              | Low                  | Low                 | Low                        | Low           | Low                | Low         |
| Preserving of the secondary structure              |          | High                           | Medium   | Medium            | Low              | High     | Low             | Medium                 | Low              | Low                  | Low                 | Low                        | High          | High               | High        |
| Complex stability (during preparation and storage) |          | Medium                         | Medium   | Low               | Low              | Medium   | Low             | Low                    | Low              | Low                  | Low                 | Low                        | Medium        | Medium             | Medium      |
| High recovery (%)                                  |          | Medium                         | Medium   | Medium            | Low              | High     | Low             | Low                    | Low              | Low                  | Low                 | Low                        | Low           | Low                | Low         |

**Figure S3.** Risk estimation matrix (REM) showing the interdependence rating between CQAs of the complex and CMAs and CPPs of the preparation method ranking them as high-risk, Medium-risk and Low-risk parameters.

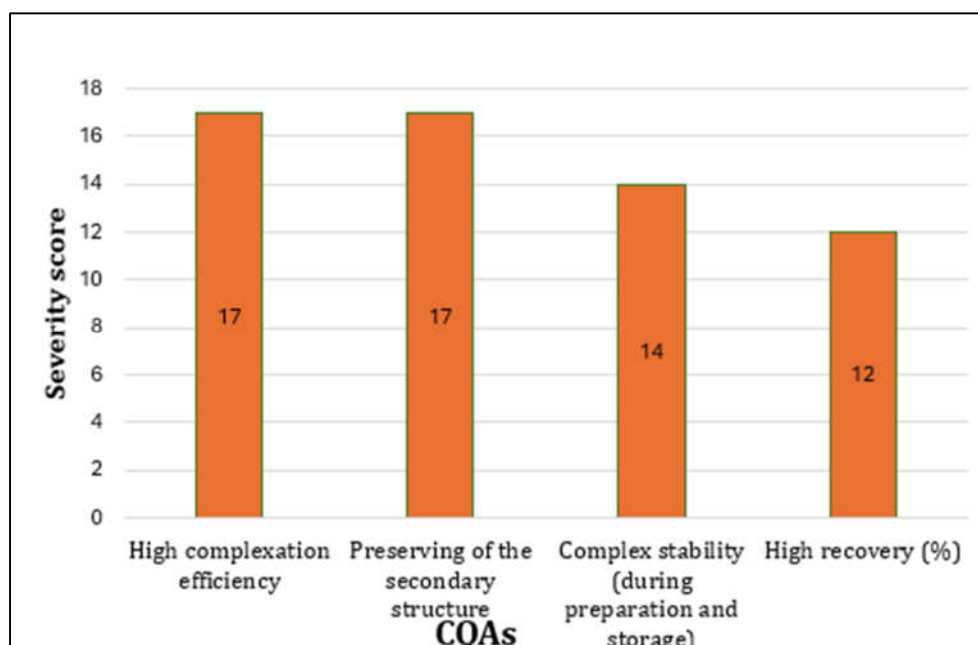

**Figure S4.** Pareto chart showing the ranking of the critical quality attributes (CQAs) of peptide/protein HIP complex.

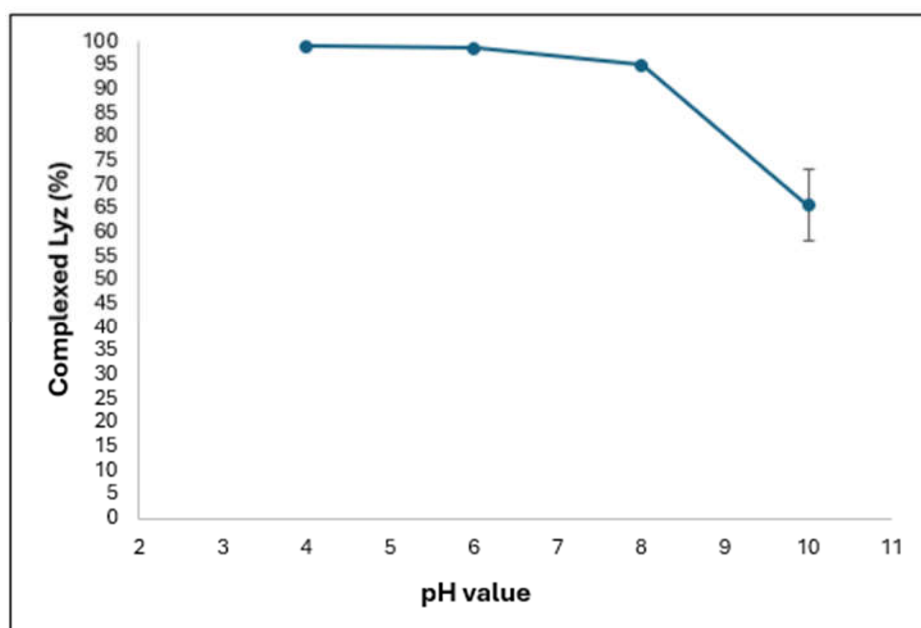

**Figure S5.** Complexation efficiency of the complexes prepared at pH 4, 6, 8 and 10 with the molar ratios obtained from the titration experiment (average of six measurements).

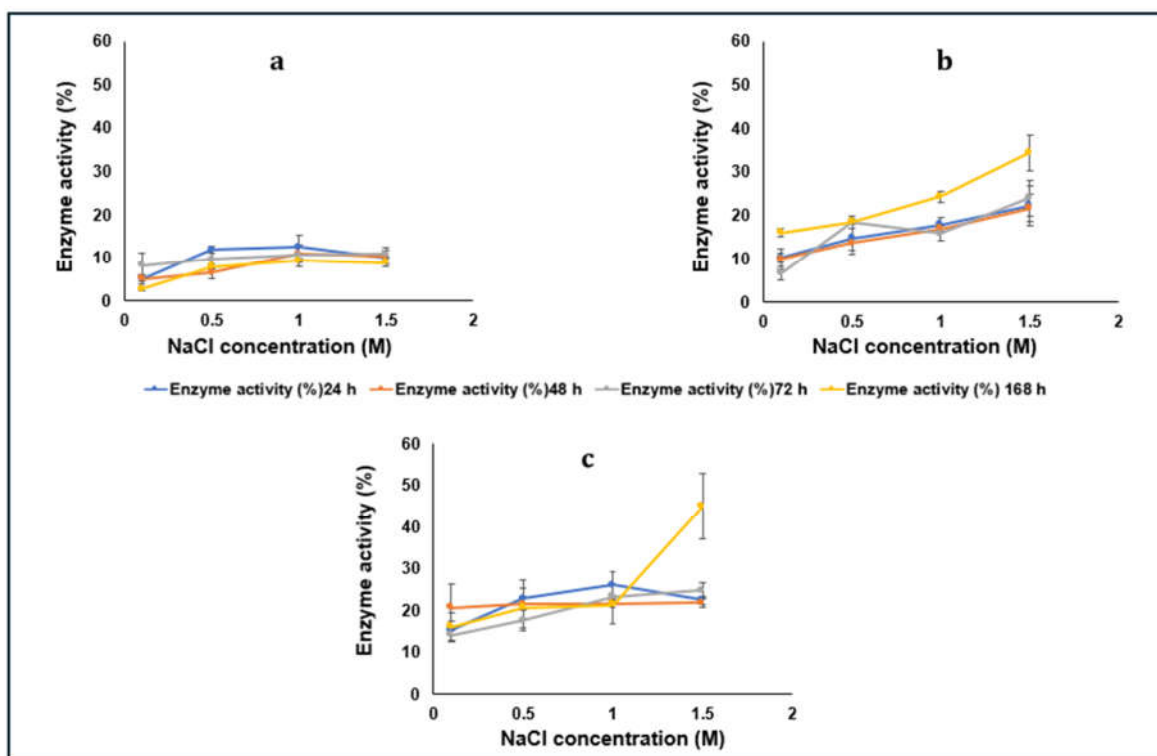

**Figure S6.** Enzymatic activity (%) of the dissociated LYZ from the HIP complex prepared at pH 4 (a), pH 6 (b) and pH 8 (c) (average of three replicates).

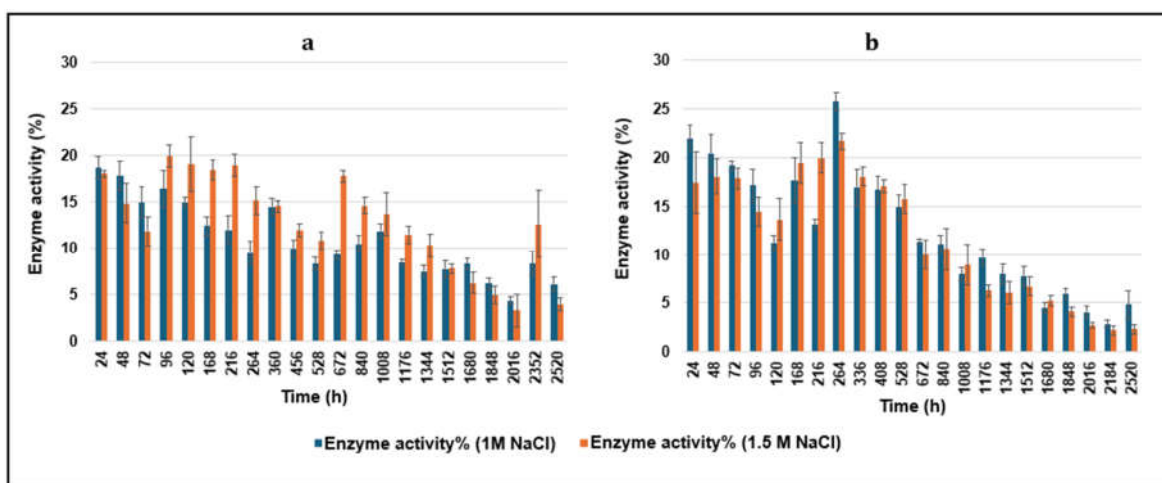

**Figure S7.** Enzyme activity (%) of LYZ recovered from the HIP complex prepared at pH 6 (a) and pH 8 (b) and collected at different time points (average of five measurements).
